# Supplementary material for: Systematic Evaluation for the Impact of the Geological Conditions on the Adsorption Affinities of Calcite as an Adsorbent of Zn2+ Ions from Aqueous Solutions: Experimental and Theoretical Studies
Source: MDPI journal article supplement (doi:10.3390/min12121635), 2022-12-19
Supplement: s1 [file s1]

# Systematic evaluation for the impact of the geological conditions on the adsorption affinities of calcite as an adsorbent of $\text{Zn}^{2+}$ ions from aqueous solutions: experimental and theoretical studies

Nourhan Nasser <sup>1,2</sup>, Mohamed I. El-Sayed <sup>1</sup>, Sarah I. Othman<sup>3</sup>, Ahmed A. Allam<sup>4</sup>, Ibrahim G. Al-Labadi<sup>5</sup>, Mostafa R. Abukhadra <sup>1,2\*</sup>, Stefano Bellucci<sup>\*6</sup>

<sup>1</sup> Geology Department, Faculty of Science, Beni-Suef University, Beni-Suef, 65211, Egypt

<sup>2</sup> Materials Technologies and their Applications Lab, Geology Department, Faculty of Science, Beni-Suef University, Beni-Suef City, Egypt.

<sup>3</sup> Biology Department, College of Science, Princess Nourah bint Abdulrahman University, Riyadh, Saudi Arabia

<sup>4</sup> Zoology Department, Faculty of Science, Beni-Suef University, Beni-Suef, Egypt

<sup>5</sup> Department of Environmental Analysis and Technologies, Institute of Environmental Sciences, Hungarian University of Agriculture and Life Sciences, Páter Károly u. 1, 2100 Gödöllő, Hungary

<sup>6</sup> INFN-Laboratori Nazionali di Frascati, Via. E. Fermi 54, 00044 Frascati, Italy

\* Correspondence: *Stefano.Bellucci@lnf.infn.it* (Stefano Bellucci\*); *Abukhadra89@science.bsu.edu.eg* (Mostafa R. Abukhadra\*)

**Table.S1.** Nonlinear equations of kinetic, classic isotherm, and advanced isotherm models

| Kinetic models                                     |                                                                                                              |                                                                                                                                                                                                                                                                         |
|----------------------------------------------------|--------------------------------------------------------------------------------------------------------------|-------------------------------------------------------------------------------------------------------------------------------------------------------------------------------------------------------------------------------------------------------------------------|
| Model                                              | Equation                                                                                                     | Parameters                                                                                                                                                                                                                                                              |
| Pseudo-first-order                                 | $q_t = q_e (1 - e^{-k_1 t})$                                                                                 | $q_t$ (mg/g) is the adsorbed ions at time (t), and $K_1$ is the rate constant of the first-order adsorption ( $\text{min}^{-1}$ )                                                                                                                                       |
| Pseudo-second-order                                | $q_t = \frac{q_e^2 k_2 t}{1 + q_e k_2 t}$                                                                    | $q_e$ is the quantity of adsorbed ions after equilibration (mg/g), and $K_2$ is the model rate constant (g/mg min).                                                                                                                                                     |
| Intra-particle diffusion                           | $q_t = kt^{0.5} + C$                                                                                         | $k_p$ ( $\text{mg g}^{-1} \text{min}^{-0.5}$ ) is the intraparticle diffusion rate constant and C is the intercept of the line                                                                                                                                          |
| Classic Isotherm models                            |                                                                                                              |                                                                                                                                                                                                                                                                         |
| Model                                              | Equation                                                                                                     | Parameters                                                                                                                                                                                                                                                              |
| Langmuir                                           | $Q_e = \frac{Q_{max} b C_e}{(1 + b C_e)}$                                                                    | $C_e$ is the rest ions concentrations (mg/L), $Q_{max}$ is the theoretical maximum adsorption capacity (mg/g), and $b$ is the Langmuir constant (L/mg)                                                                                                                  |
| Freundlich                                         | $Q_e = K_f C_e^{1/n}$                                                                                        | $K_f$ (mg/g) is the constant of Freundlich model related to the adsorption capacity and $n$ is the constant of Freundlich model related to the adsorption intensities                                                                                                   |
| Dubinin–Radushkevich                               | $Q_e = Q_m e^{-\beta \varepsilon^2}$                                                                         | $\beta$ ( $\text{mol}^2/\text{KJ}^2$ ) is the D-R constant, $\varepsilon$ ( $\text{KJ}^2/\text{mol}^2$ ) is the polanyiil potential, and $Q_m$ is the adsorption capacity (mg/g)                                                                                        |
| Advanced isotherm models                           |                                                                                                              |                                                                                                                                                                                                                                                                         |
| Model                                              | Equation                                                                                                     | Parameters                                                                                                                                                                                                                                                              |
| Monolayer model with one energy site (Model 1)     | $Q = n N_o = \frac{n N_M}{1 + (\frac{C1/2}{C})^n} = \frac{Q_o}{1 + (\frac{C1/2}{C})^n}$                      | $Q$ is the adsorbed quantities in mg/g<br>$n$ is the number of adsorbed ion per site                                                                                                                                                                                    |
| Monolayer model with two energy sites (Model 2)    | $Q = \frac{n_1 N_{1M}}{1 + (\frac{C_1}{C})^{n_1}} + \frac{n_2 N_{2M}}{1 + (\frac{C_2}{C})^{n_2}}$            | $N_m$ is the density of the effective receptor sites (mg/g)<br>$Q_o$ is the adsorption capacity at the saturation state in mg/g                                                                                                                                         |
| Double layer model with one energy site (Model 3)  | $Q = Q_o \frac{(\frac{C}{C1/2})^n + 2(\frac{C}{C1/2})^{2n}}{1 + (\frac{C}{C1/2})^n + (\frac{C}{C1/2})^{2n}}$ | $C1/2$ is the concentration of the ions at half saturation stage in mg/L                                                                                                                                                                                                |
| Double layer model with two energy sites (Model 3) | $Q = Q_o \frac{(\frac{C}{C1})^n + 2(\frac{C}{C2})^{2n}}{1 + (\frac{C}{C1})^n + (\frac{C}{C2})^{2n}}$         | $C1$ and $C2$ are the concentrations of the ions at the half saturation stage for the first active sites and the second active sites, respectively<br>$n1$ and $n2$ are the adsorbed ions per site for the first active sites and the second active sites, respectively |
